# Supplementary material for: Ochrasperfloroid, an ochratoxin–ergosteroid heterodimer with inhibition of IL-6 and NO production from Aspergillus flocculosus 16D-1
Source: Royal Society of Chemistry journal article supplement (doi:10.1039/c8ra10539a), 2019-01-01
Supplement: c8ra10539a1.pdf [file c8ra10539a1.pdf]

## Supporting Information

**Ochrasperfloroid, an Ochratoxin-Ergosteroid Heterodimer with  
Inhibition of IL-6 and NO Production from *Aspergillus flocculosus*  
16D-1**

Bin-Bin Gu, Fu-Rong Jiao, Wei Wu, Lei Liu, Wei-Hua Jiao, Fan Sun, Shu-Ping Wang,  
Fan Yang, and Hou-Wen Lin\*

*Research Center for Marine Drugs, State Key Laboratory of Oncogenes and Related  
Genes, Department of Pharmacy, Ren Ji Hospital, School of Medicine, Shanghai Jiao  
Tong University, Shanghai 200127, People's Republic of China*

# Contents

## Computational Details

### *Methods*

### *Empirical scaling of computed $^{13}\text{C}$ NMR chemical shifts*

### *References*

## Results

**Figure S1.** Conformations of low-energy conformers of model **I** calculated at B3LYP/6-31G(d) level of theory in DMSO (PCM).

**Table S1.** Cartesian Coordinates, Gibbs Free Energies (B3LYP/6-31G(d)), and Equilibrium Populations of Low-energy Conformers of Model **I** in DMSO (PCM)

**Table S2.** Comparison of Experimental  $^{13}\text{C}$  NMR Chemical Shifts of Moiety **B** in **1** and Calculated  $^{13}\text{C}$  NMR Chemical Shifts of Model **I** (B3LYP/6-311+G(2d,p)/PCM(DMSO))

**Figure S2.**  $^1\text{H}$ -NMR spectrum of **1** in DMSO- $d_6$ .

**Figure S3.**  $^{13}\text{C}$ -NMR spectrum of **1** in DMSO- $d_6$ .

**Figure S4.** DEPT135 spectrum of **1** in DMSO- $d_6$ .

**Figure S5.**  $^1\text{H}$ - $^1\text{H}$  COSY spectrum of **1** in DMSO- $d_6$ .

**Figure S6.** HSQC spectrum of **1** in DMSO- $d_6$ .

**Figure S7.** HMBC spectrum of **1** in DMSO- $d_6$ .

**Figure S8.** ROESY spectrum of **1** in DMSO- $d_6$ .

**Figure S9.** HRESIMS of **1**.

**Figure S10.** HRESIMS/MS of **1** (a) positive ion mode; (b) negative ion mode.

**Figure S11.** UV spectrum of **1** in MeOH.

**Figure S12.** IR spectrum of **1**.

**Figure S13.** CD spectrum of **1** in MeOH.

**Figure S14.**  $^1\text{H}$ -NMR spectrum of **2** in DMSO- $d_6$  + 1% TFA.

**Figure S15.**  $^{13}\text{C}$ -NMR spectrum of **2** in DMSO- $d_6$  + 1% TFA.

**Table S3.**  $^1\text{H}$  (600 MHz) and  $^{13}\text{C}$  (150 MHz) NMR Data of **2** in DMSO- $d_6$

## Computational Details.

### Methods

Monte Carlo (MCMM) conformational search was carried out by means of the MacroModel 9.9.223<sup>1</sup> software using Merck Molecular Force Field (MMFF) applying a 21 kJ/mol energy window. Conformational analysis of model **I** afforded 276 conformers, which were reclustered excluding the different orientations of the C-22 alkanol side chain. The resulting 6 geometries were subjected to geometry optimization using B3LYP/6-31G(d) with polarizable continuum model (PCM) for DMSO level of theory (Gaussian 09<sup>2</sup>). After dereplication, the resulting 6 reoptimized conformers were submitted to calculate NMR chemical shifts at B3LYP/6-311+G(2d,p) level using PCM model for DMSO (Gaussian 09). Boltzmann distribution was estimated from the B3LYP/6-31G(d) relative thermal free energies ( $\Delta G$ ) in the PCM model for DMSO. The MOLEKEL<sup>3</sup> software package was used for visualization of the results.

### Empirical scaling of computed <sup>13</sup>C NMR chemical shifts

Computed chemical shifts were scaled empirically<sup>4</sup> according to

$$\delta_{\text{scaled}}^x = \frac{\delta_{\text{calcd}}^x - \text{intercept}}{\text{slope}},$$

where  $\delta_{\text{calcd}}^x$  is the calculated chemical shift x (in ppm) relative to tetramethylsilane (TMS), which is calculated at the same level of theory, and slope and intercept are the slope and intercept resulting from a regression calculation on a plot of  $\delta_{\text{calcd}}$  against  $\delta_{\text{exptl}}$ .

### References

- (1) MacroModel, Schrödinger LLC, **2012**.  
<http://www.schrodinger.com/productpage/14/11/>.
- (2) M. J. Frisch, G. W. Trucks, H. B. Schlegel, et al. *Gaussian 09, Revision B.01*, **2010**, Gaussian, Inc., Wallingford CT.
- (3) U. Varetto, MOLEKEL 5.4., **2009**, Swiss National Supercomputing Centre: Manno, Switzerland.
- (4) G. Barone, L. Gomez-Paloma, D. Duca, A. Silvestri, R. Riccio, G. Bifulco, *Chem Eur J.* **2002**, *8*, 3233–3239.

## Results

**Figure S1.** Conformations of low-energy conformers of model **I** calculated at B3LYP/6-31G(d) level of theory in DMSO (PCM).

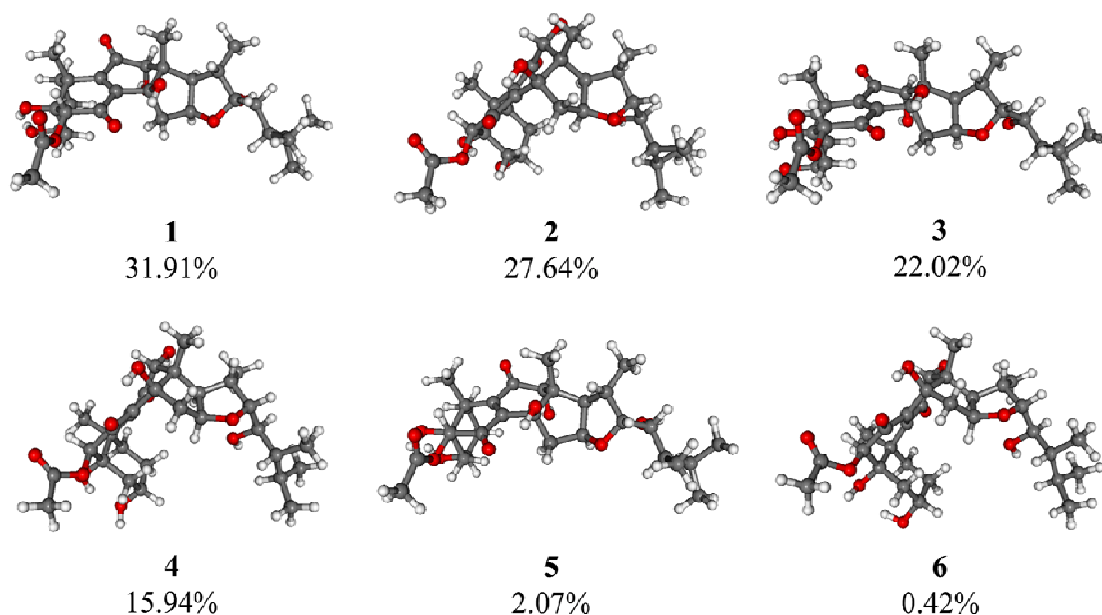

**Table S1.** Cartesian Coordinates, Gibbs Free Energies (B3LYP/6-31G(d)), and Equilibrium Populations of Low-energy Conformers of Model **I** in DMSO (PCM).

### Conformation **1**

$\Delta G = 0.00$  kcal/mol

P (%) = 31.91%

|    |   |            |             |             |
|----|---|------------|-------------|-------------|
| 1  | C | 0.05089300 | 0.10883400  | -0.84044500 |
| 2  | C | 0.77574500 | -1.23016600 | -1.18993500 |
| 3  | C | 0.74260500 | 0.59596000  | 0.46466600  |
| 4  | C | 2.17507600 | 0.03979900  | 0.43473000  |
| 5  | C | 2.24419900 | -1.02552400 | -0.69472100 |
| 6  | C | 0.64250100 | -1.59482900 | -2.68204700 |
| 7  | O | 0.32465100 | 1.00528500  | -1.92206400 |
| 8  | O | 3.11305300 | 1.07924100  | 0.09976000  |
| 9  | C | 4.07389700 | 0.57064700  | -0.83066100 |
| 10 | C | 3.27172800 | -0.43370400 | -1.69565600 |
| 11 | C | 4.10717200 | -1.46211000 | -2.46269500 |
| 12 | C | 5.33682600 | 0.03517300  | -0.13234000 |
| 13 | C | 6.00859900 | 1.08959100  | 0.78702000  |
| 14 | C | 7.17988400 | 0.48617900  | 1.61528300  |
| 15 | O | 4.96151000 | -1.13933500 | 0.60589800  |
| 16 | C | 6.42451500 | 2.34072500  | -0.00945900 |
| 17 | C | 7.59537000 | 1.40703400  | 2.77445200  |
| 18 | C | 8.40575100 | 0.09681600  | 0.77145900  |

|    |   |             |             |             |
|----|---|-------------|-------------|-------------|
| 19 | C | 0.12654300  | -2.38665200 | -0.40029900 |
| 20 | C | -1.36777900 | -2.45270700 | -0.69585100 |
| 21 | C | -2.14470100 | -1.18440700 | -0.47216200 |
| 22 | C | -1.46755900 | -0.01364700 | -0.63604900 |
| 23 | O | 0.28652300  | -2.21633500 | 1.01349500  |
| 24 | O | -1.89079400 | -3.48466500 | -1.09288500 |
| 25 | C | -3.65460000 | -1.27724700 | -0.21617400 |
| 26 | C | -4.17709500 | 0.05210000  | 0.46094500  |
| 27 | C | -3.71695700 | 1.23848800  | -0.39287000 |
| 28 | C | -2.20231700 | 1.28008800  | -0.56040000 |
| 29 | O | -1.63219300 | 2.36475400  | -0.64324400 |
| 30 | C | -4.03392900 | -2.45422900 | 0.72833300  |
| 31 | C | -3.51451900 | -2.29530100 | 2.16161900  |
| 32 | C | -4.01122700 | -0.99584300 | 2.79998000  |
| 33 | C | -3.66668400 | 0.20370600  | 1.91766500  |
| 34 | O | -5.60018200 | 0.08238200  | 0.44521900  |
| 35 | C | -4.35715000 | -1.52054300 | -1.57933000 |
| 36 | O | -5.44932400 | -0.98780600 | 2.95264200  |
| 37 | O | -4.14865600 | 2.46439900  | 0.20392500  |
| 38 | C | -4.64865800 | 3.42188400  | -0.61704200 |
| 39 | O | -4.77539700 | 3.28207100  | -1.81574200 |
| 40 | C | -5.01528500 | 4.65306600  | 0.16931900  |
| 41 | H | 0.21336000  | 0.20685100  | 1.33713900  |
| 42 | H | 0.73954400  | 1.68759800  | 0.52255100  |
| 43 | H | 2.45254100  | -0.38372100 | 1.40440100  |
| 44 | H | 2.63457900  | -1.96892500 | -0.30513600 |
| 45 | H | 1.10090600  | -0.83882600 | -3.31797900 |
| 46 | H | 1.12074200  | -2.55917000 | -2.88479300 |
| 47 | H | -0.40737700 | -1.67639700 | -2.98499100 |
| 48 | H | -0.04717100 | 1.86256600  | -1.64189600 |
| 49 | H | 4.38672700  | 1.41832800  | -1.44934100 |
| 50 | H | 2.72761200  | 0.18503300  | -2.41561000 |
| 51 | H | 4.63861300  | -2.12757700 | -1.77545800 |
| 52 | H | 4.84764400  | -0.96908400 | -3.10469800 |
| 53 | H | 3.47474500  | -2.07788600 | -3.11034100 |
| 54 | H | 6.04247900  | -0.24394500 | -0.92996600 |
| 55 | H | 5.23752600  | 1.38794500  | 1.50959900  |
| 56 | H | 6.78952900  | -0.42844400 | 2.08203100  |
| 57 | H | 5.76216000  | -1.66051200 | 0.76733100  |
| 58 | H | 7.02545500  | 3.02019900  | 0.60331000  |
| 59 | H | 7.01968800  | 2.08161000  | -0.89386300 |
| 60 | H | 5.55205300  | 2.90564200  | -0.35148300 |
| 61 | H | 8.32758200  | 0.90614000  | 3.41899600  |

|    |   |             |             |             |
|----|---|-------------|-------------|-------------|
| 62 | H | 6.73273900  | 1.67910600  | 3.39466200  |
| 63 | H | 8.05782600  | 2.33485700  | 2.41729200  |
| 64 | H | 9.15943300  | -0.39565400 | 1.39709100  |
| 65 | H | 8.87796200  | 0.97770700  | 0.32067500  |
| 66 | H | 8.15202600  | -0.59465400 | -0.04106900 |
| 67 | H | 0.57421000  | -3.33431700 | -0.72050900 |
| 68 | H | 0.16344600  | -3.08432700 | 1.43032100  |
| 69 | H | -4.16365900 | 1.16541100  | -1.39032300 |
| 70 | H | -3.68894000 | -3.39529500 | 0.30013200  |
| 71 | H | -5.12827700 | -2.50381000 | 0.74829300  |
| 72 | H | -2.41592700 | -2.28712700 | 2.17729700  |
| 73 | H | -3.82551900 | -3.15383600 | 2.77151200  |
| 74 | H | -3.55225600 | -0.86301600 | 3.78887400  |
| 75 | H | -4.10595200 | 1.11245800  | 2.33976400  |
| 76 | H | -2.57954600 | 0.33132700  | 1.93704300  |
| 77 | H | -5.89533200 | -0.34057900 | 1.27854400  |
| 78 | H | -4.06964100 | -0.78483700 | -2.33725800 |
| 79 | H | -4.08353900 | -2.50853500 | -1.95614000 |
| 80 | H | -5.44038200 | -1.47388800 | -1.44398300 |
| 81 | H | -5.72331200 | -1.82835200 | 3.35507500  |
| 82 | H | -5.47910300 | 5.38634600  | -0.49079000 |
| 83 | H | -4.11505300 | 5.08169700  | 0.62205300  |
| 84 | H | -5.70072900 | 4.39287400  | 0.98161000  |

### Conformation 2

$\Delta G = 0.08$  kcal/mol

P (%) = 27.64%

|    |   |             |             |             |
|----|---|-------------|-------------|-------------|
| 1  | C | 0.50394300  | 2.01716700  | -1.12799400 |
| 2  | C | -0.55878900 | 2.70875700  | -0.19834900 |
| 3  | C | -0.37320700 | 1.13916900  | -2.05711000 |
| 4  | C | -1.44285600 | 0.55744900  | -1.13422800 |
| 5  | C | -1.67362700 | 1.61278200  | -0.01633400 |
| 6  | C | -1.05898900 | 4.01417500  | -0.84084900 |
| 7  | O | 1.23709300  | 3.01660100  | -1.83330900 |
| 8  | O | -2.68989500 | 0.36477500  | -1.81410200 |
| 9  | C | -3.75701500 | 0.78683300  | -0.95083500 |
| 10 | C | -3.16603000 | 1.99502600  | -0.17773800 |
| 11 | C | -3.87606600 | 2.38514400  | 1.12041200  |
| 12 | C | -4.31465700 | -0.37176600 | -0.10607400 |
| 13 | C | -4.78941400 | -1.57265500 | -0.96633100 |
| 14 | C | -5.18925300 | -2.79803800 | -0.09406000 |
| 15 | O | -3.28889900 | -0.76589600 | 0.82139600  |
| 16 | C | -5.89917200 | -1.15159700 | -1.94806200 |
| 17 | C | -5.29389800 | -4.08447400 | -0.92976600 |

|    |   |             |             |             |
|----|---|-------------|-------------|-------------|
| 18 | C | -6.47043300 | -2.58692900 | 0.73085300  |
| 19 | C | 0.11216800  | 3.06280100  | 1.14210000  |
| 20 | C | 0.64915900  | 1.80382100  | 1.80878400  |
| 21 | C | 1.54098600  | 0.92490200  | 0.98447900  |
| 22 | C | 1.51632100  | 1.13323000  | -0.36346900 |
| 23 | O | -0.76679700 | 3.73048400  | 2.01940600  |
| 24 | O | 0.37068100  | 1.60639300  | 2.98645600  |
| 25 | C | 2.53471000  | -0.01805200 | 1.68702000  |
| 26 | C | 3.08168800  | -1.10203900 | 0.67226000  |
| 27 | C | 3.61142500  | -0.38033000 | -0.56688500 |
| 28 | C | 2.57208700  | 0.51702500  | -1.22271600 |
| 29 | O | 2.66842100  | 0.77238800  | -2.41945000 |
| 30 | C | 1.94202600  | -0.80502900 | 2.89313500  |
| 31 | C | 0.86096900  | -1.82157000 | 2.51310700  |
| 32 | C | 1.37548400  | -2.83849000 | 1.49108200  |
| 33 | C | 1.98877700  | -2.13066700 | 0.28271000  |
| 34 | O | 4.20115200  | -1.77612100 | 1.23657400  |
| 35 | C | 3.68539800  | 0.86702600  | 2.23832000  |
| 36 | O | 2.42157200  | -3.67169100 | 2.04283200  |
| 37 | O | 4.07098400  | -1.32635500 | -1.53664400 |
| 38 | C | 5.31029000  | -1.14100800 | -2.06001200 |
| 39 | O | 6.04391200  | -0.22732400 | -1.74623800 |
| 40 | C | 5.62518200  | -2.21888500 | -3.06323100 |
| 41 | H | 0.19467600  | 0.38822600  | -2.60985900 |
| 42 | H | -0.84977900 | 1.80458500  | -2.78540200 |
| 43 | H | -1.12276300 | -0.40083500 | -0.70810400 |
| 44 | H | -1.56695100 | 1.13384200  | 0.96006600  |
| 45 | H | -1.49107800 | 3.84727500  | -1.83167300 |
| 46 | H | -1.81992200 | 4.47387900  | -0.20562800 |
| 47 | H | -0.23292300 | 4.72000400  | -0.95473200 |
| 48 | H | 1.81159000  | 2.52433800  | -2.44964300 |
| 49 | H | -4.56569100 | 1.12706500  | -1.60520400 |
| 50 | H | -3.23993000 | 2.83888600  | -0.87088600 |
| 51 | H | -3.84521700 | 1.56645100  | 1.84623200  |
| 52 | H | -4.92584000 | 2.64481200  | 0.93765900  |
| 53 | H | -3.38395200 | 3.25188700  | 1.57236100  |
| 54 | H | -5.17452700 | 0.03229400  | 0.44968900  |
| 55 | H | -3.91514500 | -1.88150000 | -1.55453800 |
| 56 | H | -4.36064600 | -2.96080500 | 0.60839300  |
| 57 | H | -3.71298100 | -1.22284200 | 1.56295000  |
| 58 | H | -6.33605200 | -2.02090300 | -2.44971000 |
| 59 | H | -6.71370900 | -0.62128100 | -1.43939200 |
| 60 | H | -5.51235700 | -0.49207700 | -2.73084000 |

|    |   |             |             |             |
|----|---|-------------|-------------|-------------|
| 61 | H | -5.44752100 | -4.95344200 | -0.27883000 |
| 62 | H | -4.37932400 | -4.25709800 | -1.50990300 |
| 63 | H | -6.13547900 | -4.05158500 | -1.63186400 |
| 64 | H | -6.65178500 | -3.45036600 | 1.38165700  |
| 65 | H | -7.34873500 | -2.47288200 | 0.08454000  |
| 66 | H | -6.41453600 | -1.69948300 | 1.37273300  |
| 67 | H | 0.98337600  | 3.70505300  | 0.92566400  |
| 68 | H | -0.70129600 | 3.24596100  | 2.86712200  |
| 69 | H | 4.45928700  | 0.25220700  | -0.28069000 |
| 70 | H | 1.56274600  | -0.11361600 | 3.64179100  |
| 71 | H | 2.78454100  | -1.33744500 | 3.34853200  |
| 72 | H | -0.01741300 | -1.31689600 | 2.08942100  |
| 73 | H | 0.50799400  | -2.34469900 | 3.41214000  |
| 74 | H | 0.55336700  | -3.48430100 | 1.15494800  |
| 75 | H | 2.43847400  | -2.86848300 | -0.38826200 |
| 76 | H | 1.17771900  | -1.64543100 | -0.26950300 |
| 77 | H | 3.84821800  | -2.56400600 | 1.70115500  |
| 78 | H | 4.12359100  | 1.51754500  | 1.47506800  |
| 79 | H | 3.30614700  | 1.50802500  | 3.04054200  |
| 80 | H | 4.47326400  | 0.22884400  | 2.64475400  |
| 81 | H | 2.13379000  | -3.99728100 | 2.91140800  |
| 82 | H | 6.63329500  | -2.07526200 | -3.45250500 |
| 83 | H | 4.90191200  | -2.18316800 | -3.88432700 |
| 84 | H | 5.54251800  | -3.20418200 | -2.59401200 |

### Conformation 3

$\Delta G = 0.22$  kcal/mol

P (%) = 22.02%

|    |   |            |             |             |
|----|---|------------|-------------|-------------|
| 1  | C | 0.05427000 | 0.10048600  | -0.84045300 |
| 2  | C | 0.77838400 | -1.24142900 | -1.18115600 |
| 3  | C | 0.74291500 | 0.59452300  | 0.46366100  |
| 4  | C | 2.17370700 | 0.03281300  | 0.44501400  |
| 5  | C | 2.24557500 | -1.03412800 | -0.68360700 |
| 6  | C | 0.64912200 | -1.61275300 | -2.67186700 |
| 7  | O | 0.33167700 | 0.99046900  | -1.92652900 |
| 8  | O | 3.11888500 | 1.06730800  | 0.11582700  |
| 9  | C | 4.08294200 | 0.55362000  | -0.80847900 |
| 10 | C | 3.27104100 | -0.43504400 | -1.68243800 |
| 11 | C | 4.09055600 | -1.44483700 | -2.49133000 |
| 12 | C | 5.33043900 | 0.00343400  | -0.08880700 |
| 13 | C | 5.99200500 | 1.02961800  | 0.86021400  |
| 14 | C | 7.28661700 | 0.45126100  | 1.50299000  |
| 15 | O | 4.99984200 | -1.14916400 | 0.71016200  |
| 16 | C | 6.21543900 | 2.39476100  | 0.18545900  |



|    |   |             |             |             |
|----|---|-------------|-------------|-------------|
| 17 | C | 7.66145700  | 1.19930200  | 2.79255600  |
| 18 | C | 8.48781800  | 0.40144000  | 0.54361200  |
| 19 | C | 0.12633700  | -2.39327300 | -0.38714700 |
| 20 | C | -1.36735600 | -2.45885500 | -0.68684800 |
| 21 | C | -2.14322600 | -1.18889400 | -0.47060700 |
| 22 | C | -1.46470000 | -0.01957400 | -0.63908000 |
| 23 | O | 0.28360400  | -2.21482500 | 1.02562400  |
| 24 | O | -1.89021400 | -3.49169000 | -1.08152100 |
| 25 | C | -3.65369000 | -1.27734100 | -0.21775300 |
| 26 | C | -4.17183800 | 0.05526000  | 0.45601600  |
| 27 | C | -3.71283200 | 1.23768200  | -0.40260500 |
| 28 | C | -2.19792500 | 1.27557800  | -0.57121000 |
| 29 | O | -1.62637200 | 2.35891800  | -0.66099100 |
| 30 | C | -4.04177500 | -2.45142700 | 0.72753700  |
| 31 | C | -3.53598300 | -2.29155600 | 2.16634400  |
| 32 | C | -4.02792200 | -0.99017200 | 2.79480300  |
| 33 | C | -3.65974400 | 0.20729900  | 1.91167500  |
| 34 | O | -5.59507500 | 0.08623400  | 0.44715600  |
| 35 | C | -4.35350000 | -1.52025600 | -1.58252900 |
| 36 | O | -5.46793500 | -1.09591300 | 2.93828100  |
| 37 | O | -4.14166300 | 2.46644600  | 0.19055300  |
| 38 | C | -4.63516400 | 3.42433000  | -0.63413000 |
| 39 | O | -4.75964400 | 3.28204600  | -1.83272700 |
| 40 | C | -4.99802300 | 4.65913700  | 0.14828600  |
| 41 | H | 0.20841100  | 0.21471100  | 1.33702300  |
| 42 | H | 0.74417600  | 1.68654400  | 0.51274200  |
| 43 | H | 2.44142500  | -0.39258600 | 1.41606300  |
| 44 | H | 2.63306800  | -1.97899100 | -0.29180100 |
| 45 | H | 1.11118000  | -0.86060000 | -3.30982100 |
| 46 | H | 1.12487500  | -2.57953700 | -2.86872900 |
| 47 | H | -0.40002800 | -1.69253400 | -2.97752100 |
| 48 | H | -0.04127800 | 1.84944500  | -1.65289700 |
| 49 | H | 4.40950400  | 1.39798900  | -1.42599900 |
| 50 | H | 2.72253400  | 0.19930100  | -2.38498600 |
| 51 | H | 4.60281100  | -2.17561500 | -1.85418600 |
| 52 | H | 4.85185700  | -0.93928800 | -3.09726900 |
| 53 | H | 3.45175000  | -2.01128000 | -3.17572500 |
| 54 | H | 6.05608900  | -0.28092100 | -0.86497000 |
| 55 | H | 5.27050300  | 1.17659600  | 1.67542900  |
| 56 | H | 7.04561400  | -0.58005900 | 1.78680200  |
| 57 | H | 5.12527300  | -1.94211900 | 0.16904900  |
| 58 | H | 6.80835100  | 3.05500200  | 0.82724000  |
| 59 | H | 6.74825100  | 2.29926000  | -0.76849400 |

|    |   |             |             |             |
|----|---|-------------|-------------|-------------|
| 60 | H | 5.26587400  | 2.90112100  | -0.01089900 |
| 61 | H | 8.52386700  | 0.72656100  | 3.27822200  |
| 62 | H | 6.83103800  | 1.19735500  | 3.50918900  |
| 63 | H | 7.93142900  | 2.24467100  | 2.59716800  |
| 64 | H | 9.33213400  | -0.11328300 | 1.01774100  |
| 65 | H | 8.82963900  | 1.40697100  | 0.27002500  |
| 66 | H | 8.25684900  | -0.13566500 | -0.38393500 |
| 67 | H | 0.57362700  | -3.34316600 | -0.70136100 |
| 68 | H | 0.15556600  | -3.07947700 | 1.44791300  |
| 69 | H | -4.16075400 | 1.16222100  | -1.39933900 |
| 70 | H | -3.69133000 | -3.39313500 | 0.30493600  |
| 71 | H | -5.13599900 | -2.50363900 | 0.73684500  |
| 72 | H | -2.43790600 | -2.28736100 | 2.18915000  |
| 73 | H | -3.86704400 | -3.13875400 | 2.77731200  |
| 74 | H | -3.58418100 | -0.86338300 | 3.78973000  |
| 75 | H | -4.08186200 | 1.12860000  | 2.32658300  |
| 76 | H | -2.57018000 | 0.32040800  | 1.93149300  |
| 77 | H | -5.88269200 | -0.36315700 | 1.27017000  |
| 78 | H | -4.05799900 | -0.78982400 | -2.34247000 |
| 79 | H | -4.08608200 | -2.51177300 | -1.95464600 |
| 80 | H | -5.43685100 | -1.46531900 | -1.45098700 |
| 81 | H | -5.75576700 | -0.39189700 | 3.54303000  |
| 82 | H | -5.45809600 | 5.39233100  | -0.51452800 |
| 83 | H | -4.09665600 | 5.08557100  | 0.60085100  |
| 84 | H | -5.68551700 | 4.40404700  | 0.96045900  |

#### Conformation 4

$\Delta G = 0.41$  kcal/mol

P (%) = 15.94%

|    |   |             |             |             |
|----|---|-------------|-------------|-------------|
| 1  | C | 0.50446800  | 2.01574800  | -1.13257100 |
| 2  | C | -0.55899200 | 2.70965000  | -0.20553100 |
| 3  | C | -0.37194500 | 1.13465600  | -2.05942800 |
| 4  | C | -1.44148000 | 0.55502800  | -1.13511900 |
| 5  | C | -1.67266600 | 1.61307700  | -0.01987900 |
| 6  | C | -1.06043400 | 4.01223800  | -0.85276100 |
| 7  | O | 1.23763000  | 3.01332900  | -1.84053800 |
| 8  | O | -2.68847100 | 0.36026700  | -1.81447900 |
| 9  | C | -3.75573900 | 0.78322500  | -0.95178300 |
| 10 | C | -3.16554600 | 1.99343600  | -0.18119600 |
| 11 | C | -3.87512800 | 2.38512300  | 1.11674400  |
| 12 | C | -4.31215000 | -0.37416200 | -0.10455800 |
| 13 | C | -4.78700300 | -1.57676100 | -0.96239300 |
| 14 | C | -5.18499300 | -2.80104900 | -0.08777000 |
| 15 | O | -3.28537000 | -0.76613000 | 0.82267500  |

|    |   |             |             |             |
|----|---|-------------|-------------|-------------|
| 16 | C | -5.89816900 | -1.15802600 | -1.94353600 |
| 17 | C | -5.28929900 | -4.08892000 | -0.92130200 |
| 18 | C | -6.46562000 | -2.58968700 | 0.73792600  |
| 19 | C | 0.11149900  | 3.06925100  | 1.13379400  |
| 20 | C | 0.64826000  | 1.81257000  | 1.80492100  |
| 21 | C | 1.54143100  | 0.93180800  | 0.98417500  |
| 22 | C | 1.51681100  | 1.13476300  | -0.36462500 |
| 23 | O | -0.76786900 | 3.73981200  | 2.00850300  |
| 24 | O | 0.36708900  | 1.61777900  | 2.98237800  |
| 25 | C | 2.53686400  | -0.00756300 | 1.68863100  |
| 26 | C | 3.07717800  | -1.09826100 | 0.67751700  |
| 27 | C | 3.60966400  | -0.38448000 | -0.56418200 |
| 28 | C | 2.57217200  | 0.51467800  | -1.22156500 |
| 29 | O | 2.66978300  | 0.76727600  | -2.41879700 |
| 30 | C | 1.95069900  | -0.78693200 | 2.90317700  |
| 31 | C | 0.87211500  | -1.81240400 | 2.53729100  |
| 32 | C | 1.38272500  | -2.83070500 | 1.52069800  |
| 33 | C | 1.97905200  | -2.12421000 | 0.29753400  |
| 34 | O | 4.19155700  | -1.77848800 | 1.24489700  |
| 35 | C | 3.69129400  | 0.88006300  | 2.22824400  |
| 36 | O | 2.39142100  | -3.63497100 | 2.18564800  |
| 37 | O | 4.06332200  | -1.33619500 | -1.53138700 |
| 38 | C | 5.29642300  | -1.14939900 | -2.06898000 |
| 39 | O | 6.03103500  | -0.23281300 | -1.76630300 |
| 40 | C | 5.60302200  | -2.22967100 | -3.07222500 |
| 41 | H | 0.19651300  | 0.38238200  | -2.60975400 |
| 42 | H | -0.84866500 | 1.79764900  | -2.78981500 |
| 43 | H | -1.12106800 | -0.40204300 | -0.70645500 |
| 44 | H | -1.56479400 | 1.13661800  | 0.95759900  |
| 45 | H | -1.49279900 | 3.84128700  | -1.84278100 |
| 46 | H | -1.82147100 | 4.47376500  | -0.21899300 |
| 47 | H | -0.23493900 | 4.71825200  | -0.96958800 |
| 48 | H | 1.81311500  | 2.51935700  | -2.45458300 |
| 49 | H | -4.56482100 | 1.12151400  | -1.60665100 |
| 50 | H | -3.24075500 | 2.83600800  | -0.87575800 |
| 51 | H | -3.84300800 | 1.56773800  | 1.84398400  |
| 52 | H | -4.92527000 | 2.64350400  | 0.93428200  |
| 53 | H | -3.38348700 | 3.25311200  | 1.56682000  |
| 54 | H | -5.17177100 | 0.03038000  | 0.45122500  |
| 55 | H | -3.91317500 | -1.88592100 | -1.55110400 |
| 56 | H | -4.35562300 | -2.96189700 | 0.61421500  |
| 57 | H | -3.70858100 | -1.22095400 | 1.56603200  |
| 58 | H | -6.33502400 | -2.02841600 | -2.44333300 |

|    |   |             |             |             |
|----|---|-------------|-------------|-------------|
| 59 | H | -6.71249700 | -0.62749800 | -1.43475400 |
| 60 | H | -5.51276400 | -0.49944000 | -2.72779800 |
| 61 | H | -5.44164200 | -4.95696800 | -0.26884200 |
| 62 | H | -4.37508600 | -4.26172600 | -1.50196800 |
| 63 | H | -6.13151000 | -4.05785500 | -1.62272900 |
| 64 | H | -6.64556000 | -3.45213400 | 1.39042800  |
| 65 | H | -7.34462100 | -2.47760300 | 0.09221800  |
| 66 | H | -6.40995300 | -1.70105500 | 1.37817900  |
| 67 | H | 0.98238300  | 3.71112000  | 0.91516000  |
| 68 | H | -0.70464900 | 3.25645200  | 2.85707900  |
| 69 | H | 4.46084700  | 0.24542500  | -0.28212000 |
| 70 | H | 1.56876600  | -0.08963600 | 3.64511700  |
| 71 | H | 2.79608300  | -1.30967800 | 3.36403000  |
| 72 | H | -0.00851100 | -1.31231800 | 2.11396800  |
| 73 | H | 0.53727900  | -2.33922500 | 3.43798500  |
| 74 | H | 0.56403100  | -3.48747700 | 1.20279800  |
| 75 | H | 2.41976500  | -2.85763900 | -0.38575500 |
| 76 | H | 1.16201000  | -1.63696400 | -0.24567600 |
| 77 | H | 3.82585300  | -2.54373300 | 1.73822100  |
| 78 | H | 4.12281300  | 1.52918700  | 1.46000400  |
| 79 | H | 3.31780500  | 1.52275200  | 3.03186700  |
| 80 | H | 4.48291400  | 0.24365100  | 2.63026900  |
| 81 | H | 2.54902500  | -4.42156000 | 1.63746000  |
| 82 | H | 6.60953600  | -2.08952400 | -3.46687000 |
| 83 | H | 4.87588000  | -2.19196800 | -3.88987300 |
| 84 | H | 5.51933300  | -3.21434400 | -2.60199400 |

### Conformation 5

$\Delta G = 1.61$  kcal/mol

P (%) = 2.07%

|    |   |            |             |             |
|----|---|------------|-------------|-------------|
| 1  | C | 0.03622800 | 0.14301600  | -0.79858600 |
| 2  | C | 0.75749900 | -1.17128800 | -1.23524200 |
| 3  | C | 0.73776800 | 0.54972400  | 0.52815800  |
| 4  | C | 2.17143500 | 0.00139500  | 0.44836900  |
| 5  | C | 2.23071100 | -0.99451800 | -0.74326700 |
| 6  | C | 0.60771500 | -1.44662100 | -2.74463900 |
| 7  | O | 0.30112800 | 1.10513000  | -1.82473900 |
| 8  | O | 3.10116400 | 1.06277000  | 0.16419600  |
| 9  | C | 4.05505100 | 0.61254400  | -0.80299300 |
| 10 | C | 3.24804100 | -0.34318200 | -1.71729100 |
| 11 | C | 4.07896500 | -1.32380800 | -2.54900800 |
| 12 | C | 5.32608300 | 0.04254400  | -0.14788000 |
| 13 | C | 6.00340100 | 1.04608700  | 0.82291000  |
| 14 | C | 7.17696600 | 0.39830700  | 1.61375200  |

|    |   |             |             |             |
|----|---|-------------|-------------|-------------|
| 15 | O | 4.95991800  | -1.17299000 | 0.52546200  |
| 16 | C | 6.41841100  | 2.33613300  | 0.09068100  |
| 17 | C | 7.60436500  | 1.26039800  | 2.81301300  |
| 18 | C | 8.39539200  | 0.04377600  | 0.74418100  |
| 19 | C | 0.11779800  | -2.37272000 | -0.50812600 |
| 20 | C | -1.38168800 | -2.42638600 | -0.78128900 |
| 21 | C | -2.15746500 | -1.17103100 | -0.48774000 |
| 22 | C | -1.48059800 | 0.00706700  | -0.59457100 |
| 23 | O | 0.29926500  | -2.28804100 | 0.91041000  |
| 24 | O | -1.90932200 | -3.44284400 | -1.21034100 |
| 25 | C | -3.66713700 | -1.29216600 | -0.21513200 |
| 26 | C | -4.17443200 | 0.01977600  | 0.47970100  |
| 27 | C | -3.73195800 | 1.21982300  | -0.36494500 |
| 28 | C | -2.21433400 | 1.29669800  | -0.45208900 |
| 29 | O | -1.64827200 | 2.38401500  | -0.42162300 |
| 30 | C | -4.00759100 | -2.49009700 | 0.72122700  |
| 31 | C | -3.47318200 | -2.33724800 | 2.14866300  |
| 32 | C | -4.01709200 | -1.06298800 | 2.80873900  |
| 33 | C | -3.67734400 | 0.15822000  | 1.94199600  |
| 34 | O | -5.61326500 | -0.03710100 | 0.48413500  |
| 35 | C | -4.38352300 | -1.53256400 | -1.57346900 |
| 36 | O | -5.42310800 | -1.15868500 | 3.06173000  |
| 37 | O | -4.26079400 | 2.41282800  | 0.22213600  |
| 38 | C | -4.55136400 | 3.44872900  | -0.62068200 |
| 39 | O | -4.43706500 | 3.37549200  | -1.82372500 |
| 40 | C | -5.02412900 | 4.64536000  | 0.15913900  |
| 41 | H | 0.21800400  | 0.10487500  | 1.37922300  |
| 42 | H | 0.73235200  | 1.63553300  | 0.65479700  |
| 43 | H | 2.46191800  | -0.47800300 | 1.38765600  |
| 44 | H | 2.62524300  | -1.95889700 | -0.41403800 |
| 45 | H | 1.05404800  | -0.65103300 | -3.33966100 |
| 46 | H | 1.08852800  | -2.39411700 | -3.01048100 |
| 47 | H | -0.44557400 | -1.51656300 | -3.03886000 |
| 48 | H | -0.03977600 | 1.95100800  | -1.48054600 |
| 49 | H | 4.35904100  | 1.49588000  | -1.37433200 |
| 50 | H | 2.69649500  | 0.31399100  | -2.39621200 |
| 51 | H | 4.61817500  | -2.02589800 | -1.90566500 |
| 52 | H | 4.81237700  | -0.79291700 | -3.16850900 |
| 53 | H | 3.44198100  | -1.90338500 | -3.22502000 |
| 54 | H | 6.02516200  | -0.18874900 | -0.96636500 |
| 55 | H | 5.23611600  | 1.30788900  | 1.56352000  |
| 56 | H | 6.78479700  | -0.53570500 | 2.03867300  |
| 57 | H | 5.76478900  | -1.69542400 | 0.66001300  |

|    |   |             |             |             |
|----|---|-------------|-------------|-------------|
| 58 | H | 7.02167600  | 2.98268500  | 0.73589400  |
| 59 | H | 7.01082700  | 2.12227600  | -0.80755200 |
| 60 | H | 5.54573300  | 2.91885000  | -0.21946800 |
| 61 | H | 8.33576700  | 0.72425500  | 3.42949400  |
| 62 | H | 6.74657100  | 1.50884700  | 3.44961700  |
| 63 | H | 8.07206300  | 2.20073900  | 2.49798000  |
| 64 | H | 9.15150500  | -0.47965600 | 1.34107500  |
| 65 | H | 8.86783700  | 0.94277000  | 0.33095500  |
| 66 | H | 8.13336400  | -0.60874600 | -0.09748300 |
| 67 | H | 0.55966100  | -3.29938900 | -0.89191700 |
| 68 | H | 0.16657700  | -3.17642500 | 1.27889400  |
| 69 | H | -4.12483000 | 1.12915800  | -1.38256700 |
| 70 | H | -3.64738800 | -3.41442500 | 0.26939700  |
| 71 | H | -5.10015700 | -2.56830100 | 0.75636000  |
| 72 | H | -2.37446500 | -2.29935300 | 2.14478400  |
| 73 | H | -3.76306800 | -3.20679500 | 2.74960600  |
| 74 | H | -3.55107100 | -0.93418800 | 3.79234200  |
| 75 | H | -4.12664600 | 1.05771700  | 2.37676500  |
| 76 | H | -2.59200500 | 0.30602800  | 1.96254300  |
| 77 | H | -5.92648000 | 0.84937400  | 0.73784000  |
| 78 | H | -4.13772300 | -0.77153100 | -2.32051600 |
| 79 | H | -4.07301900 | -2.50014700 | -1.97190400 |
| 80 | H | -5.46590000 | -1.53749100 | -1.42712900 |
| 81 | H | -5.86239700 | -0.94126400 | 2.21846900  |
| 82 | H | -5.34079100 | 5.42930500  | -0.52901700 |
| 83 | H | -4.20908100 | 5.01574400  | 0.78980600  |
| 84 | H | -5.85137300 | 4.36703200  | 0.81893700  |

### Conformation 6

$\Delta G = 2.55$  kcal/mol

P (%) = 0.42%

|    |   |             |             |             |
|----|---|-------------|-------------|-------------|
| 1  | C | -0.56319600 | -2.00624500 | -1.03154800 |
| 2  | C | 0.48825000  | -2.69433600 | -0.08651100 |
| 3  | C | 0.33062200  | -1.19124400 | -2.00163800 |
| 4  | C | 1.42628700  | -0.60711700 | -1.11145600 |
| 5  | C | 1.63456200  | -1.62406900 | 0.04588700  |
| 6  | C | 0.94489800  | -4.03602800 | -0.68509600 |
| 7  | O | -1.33510500 | -3.00641900 | -1.69255000 |
| 8  | O | 2.67243600  | -0.48080100 | -1.80803400 |
| 9  | C | 3.73322200  | -0.89530400 | -0.93313800 |
| 10 | C | 3.11448900  | -2.05455400 | -0.10867100 |
| 11 | C | 3.82298200  | -2.41289400 | 1.19937800  |
| 12 | C | 4.32562700  | 0.28114200  | -0.13817100 |
| 13 | C | 4.82858200  | 1.43321300  | -1.04745700 |

|    |   |             |             |             |
|----|---|-------------|-------------|-------------|
| 14 | C | 5.26570700  | 2.68110400  | -0.22628500 |
| 15 | O | 3.31518500  | 0.73929500  | 0.77667000  |
| 16 | C | 5.92229700  | 0.94293900  | -2.01489800 |
| 17 | C | 5.40482500  | 3.92895700  | -1.11389900 |
| 18 | C | 6.54269200  | 2.46710800  | 0.60442600  |
| 19 | C | -0.17987600 | -2.97637800 | 1.26921100  |
| 20 | C | -0.68047200 | -1.68439100 | 1.90214800  |
| 21 | C | -1.52348300 | -0.78569200 | 1.04679700  |
| 22 | C | -1.53534500 | -1.06085000 | -0.28978500 |
| 23 | O | 0.68782300  | -3.63952800 | 2.16088200  |
| 24 | O | -0.44166700 | -1.49054200 | 3.08890400  |
| 25 | C | -2.42639000 | 0.25776300  | 1.73536000  |
| 26 | C | -3.03540200 | 1.22660800  | 0.65944700  |
| 27 | C | -3.65378400 | 0.38607800  | -0.45894000 |
| 28 | C | -2.60082100 | -0.46477500 | -1.15273600 |
| 29 | O | -2.69720300 | -0.70854700 | -2.34960700 |
| 30 | C | -1.67916500 | 1.13938100  | 2.78594900  |
| 31 | C | -0.64410400 | 2.10080700  | 2.19524400  |
| 32 | C | -1.28592600 | 3.04576400  | 1.17141300  |
| 33 | C | -1.99834000 | 2.22692600  | 0.08579500  |
| 34 | O | -4.08128100 | 1.96946700  | 1.31275900  |
| 35 | C | -3.53564000 | -0.52460000 | 2.49346700  |
| 36 | O | -2.17185300 | 3.97997400  | 1.79763800  |
| 37 | O | -4.28883200 | 1.25643300  | -1.39991600 |
| 38 | C | -5.40964700 | 0.78722500  | -2.02873600 |
| 39 | O | -5.90711400 | -0.28762700 | -1.77955900 |
| 40 | C | -5.90575600 | 1.78864000  | -3.03549300 |
| 41 | H | -0.22011500 | -0.44621600 | -2.57885500 |
| 42 | H | 0.77891700  | -1.89986300 | -2.70675900 |
| 43 | H | 1.13958000  | 0.37690900  | -0.72246300 |
| 44 | H | 1.54704000  | -1.10505700 | 1.00383400  |
| 45 | H | 1.37323900  | -3.91770800 | -1.68445900 |
| 46 | H | 1.69766600  | -4.49453600 | -0.03937200 |
| 47 | H | 0.09796200  | -4.72133500 | -0.76685300 |
| 48 | H | -1.88180400 | -2.52732100 | -2.34226500 |
| 49 | H | 4.52880900  | -1.28323700 | -1.57687500 |
| 50 | H | 3.15950400  | -2.92691300 | -0.76820400 |
| 51 | H | 3.81971300  | -1.56597600 | 1.89273000  |
| 52 | H | 4.86396000  | -2.70799600 | 1.02017800  |
| 53 | H | 3.31087800  | -3.24752800 | 1.68796300  |
| 54 | H | 5.17698000  | -0.12331300 | 0.43025800  |
| 55 | H | 3.96038000  | 1.74225200  | -1.64450800 |
| 56 | H | 4.44421100  | 2.89617800  | 0.47039600  |

|    |   |             |             |             |
|----|---|-------------|-------------|-------------|
| 57 | H | 3.75406400  | 1.21636900  | 1.49657900  |
| 58 | H | 6.38066300  | 1.77922600  | -2.55216000 |
| 59 | H | 6.72408900  | 0.41127500  | -1.48772300 |
| 60 | H | 5.51451900  | 0.26346200  | -2.76947000 |
| 61 | H | 5.58377300  | 4.81906000  | -0.49901300 |
| 62 | H | 4.49442900  | 4.10334500  | -1.70004800 |
| 63 | H | 6.24396000  | 3.84393900  | -1.81454900 |
| 64 | H | 6.75100700  | 3.35120700  | 1.21834300  |
| 65 | H | 7.41536200  | 2.30062500  | -0.03815200 |
| 66 | H | 6.46301000  | 1.60919400  | 1.28291100  |
| 67 | H | -1.07450800 | -3.59731900 | 1.08389500  |
| 68 | H | 0.59554700  | -3.16524500 | 3.01159900  |
| 69 | H | -4.41008100 | -0.29186600 | -0.04914700 |
| 70 | H | -1.22380300 | 0.49853700  | 3.53732500  |
| 71 | H | -2.45161700 | 1.72642900  | 3.29639100  |
| 72 | H | 0.17403000  | 1.54653100  | 1.71441100  |
| 73 | H | -0.19516600 | 2.69498600  | 2.99956100  |
| 74 | H | -0.50789200 | 3.65424300  | 0.69651000  |
| 75 | H | -2.51519800 | 2.89950200  | -0.60736800 |
| 76 | H | -1.23946700 | 1.69574000  | -0.49908700 |
| 77 | H | -4.58201000 | 2.42228100  | 0.61090900  |
| 78 | H | -4.07496700 | -1.22711400 | 1.85061400  |
| 79 | H | -3.08236500 | -1.09991300 | 3.30519200  |
| 80 | H | -4.25605800 | 0.17348300  | 2.92390000  |
| 81 | H | -3.01188300 | 3.50345900  | 1.93325500  |
| 82 | H | -6.85002700 | 1.44542500  | -3.45846200 |
| 83 | H | -5.16429700 | 1.90230800  | -3.83330500 |
| 84 | H | -6.03730400 | 2.76782000  | -2.56553100 |



**Table S2.** Comparison of Experimental  $^{13}\text{C}$  NMR Chemical Shifts of Moiety **B** in **1** and Calculated  $^{13}\text{C}$  NMR Chemical Shifts of Model **I** (B3LYP/6-311+G(2d,p)/PCM(DMSO))<sup>[a]</sup>

| Nucleus # | Exptl       | Calcd <sup>[b]</sup> | Nucleus # | Exptl                          | Calcd <sup>[b]</sup> |
|-----------|-------------|----------------------|-----------|--------------------------------|----------------------|
| 1         | 23.1        | 24.4                 | 13        | 54.7                           | 54.7                 |
| 2         | 29.2        | 30.5                 | 14        | 80.7                           | 82.5                 |
| 3         | 64.4        | 68.3                 | 15        | 49.6                           | 47.3                 |
| 4         | 31.8        | 31.0                 | 16        | 85                             | 83.0                 |
| 5         | 75.1        | 76.0                 | 17        | 58.7                           | 57.4                 |
| 6         | 78.5        | 75.2                 | 18        | 15.14                          | 14.7                 |
| 7         | 193.7       | 196.0                | 19        | 22.7                           | 21.1                 |
| 8         | 145.5       | 142.6                | 20        | 38.7                           | 40.5                 |
| 9         | 146.8       | 149.4                | 21        | 15.08                          | 12.8                 |
| 10        | <b>44.2</b> | <b>48.6</b>          | 22        | 81.6                           | 82.2                 |
| 11        | 202.5       | 200.7                |           | CMAE <sup>[c]</sup>            | 1.9                  |
| 12        | 82.1        | 79.8                 |           | RMSD <sup>[d]</sup>            | 2.2                  |
|           |             |                      |           | largest outlier <sup>[e]</sup> | $\Delta\delta = 4.4$ |

[a] Since our conformational search disregarding the orientations of the C-22 alkanol side chain, this NMR chemical shifts comparison did not include the chemical shifts of the C-22 alkanol side chain. [b] See computational details. [c] CMAE = corrected mean absolute error, computed as  $(1/n)\sum_i |\delta_{\text{calcd}} - \delta_{\text{exptl}}|$ , where  $\delta_{\text{calcd}}$  refers to the scaled calculated chemical shifts here. [d] RMSD = root-mean-square deviation. [e] Largest outlier is highlighted in bold text.

**Figure S2.**  $^1\text{H}$ -NMR spectrum of **1** in DMSO- $d_6$ .

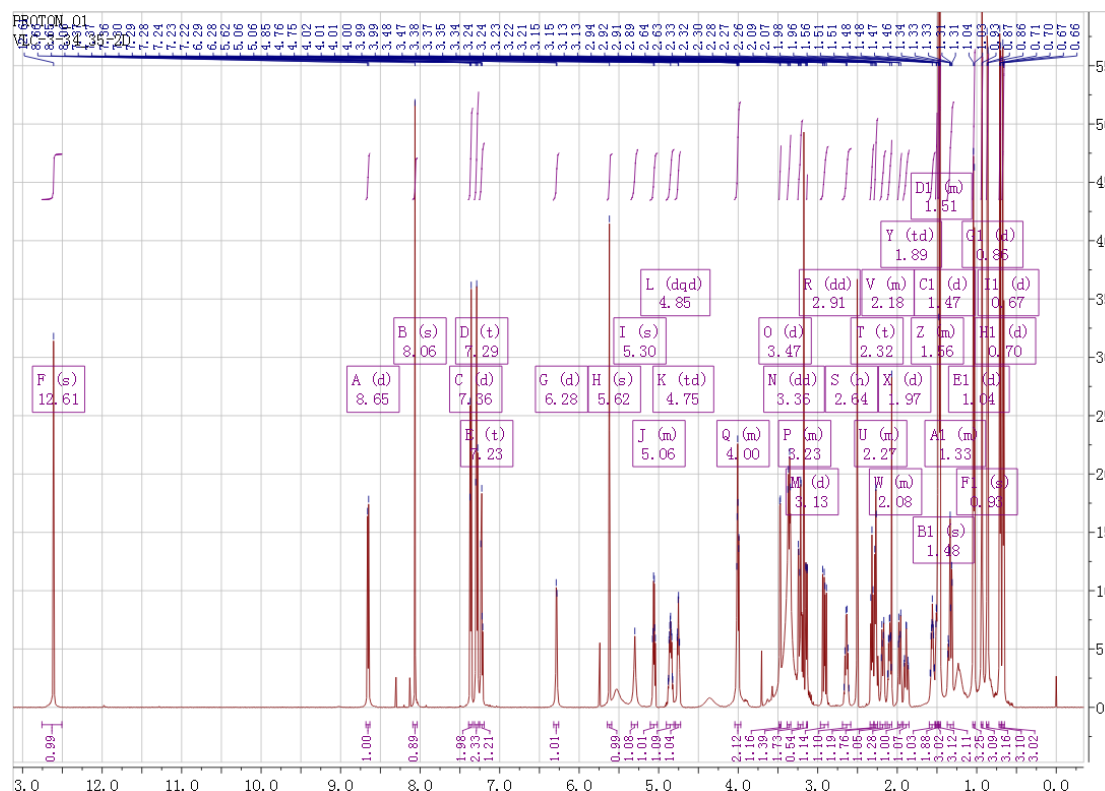

**Figure S3.**  $^{13}\text{C}$ -NMR spectrum of **1** in  $\text{DMSO-}d_6$ .

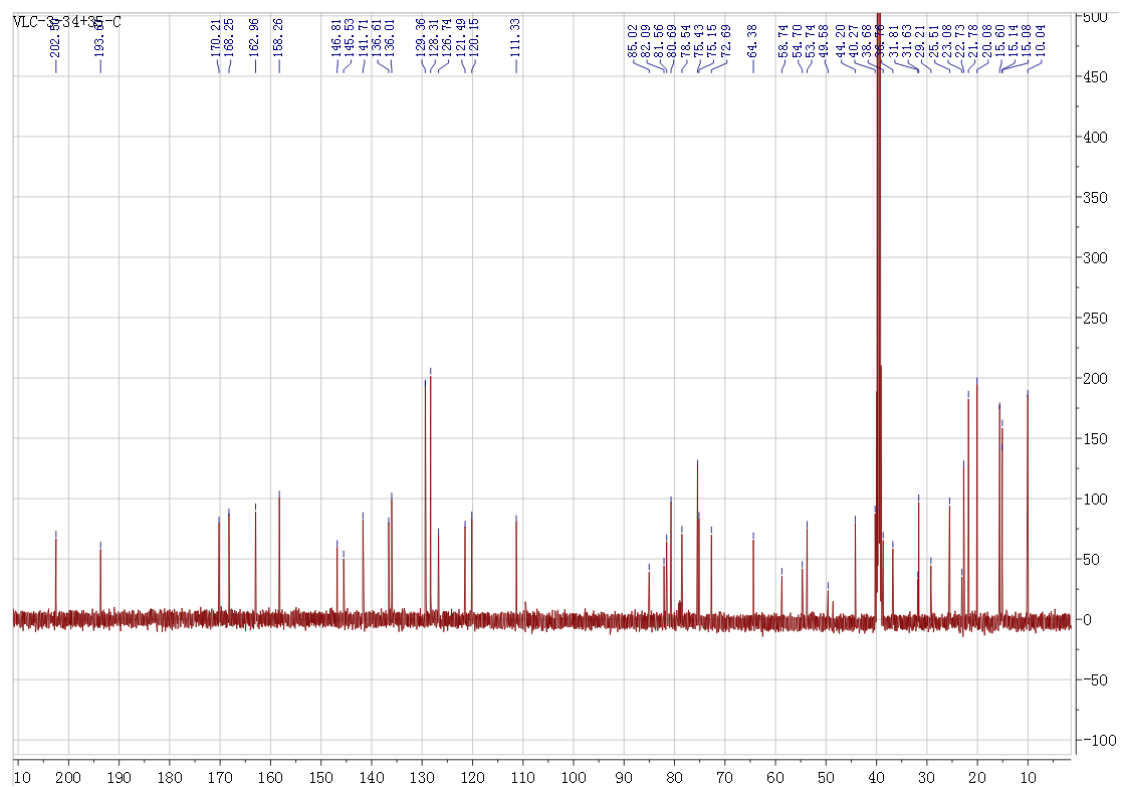

**Figure S4.** DEPT135 spectrum of **1** in  $\text{DMSO-}d_6$ .

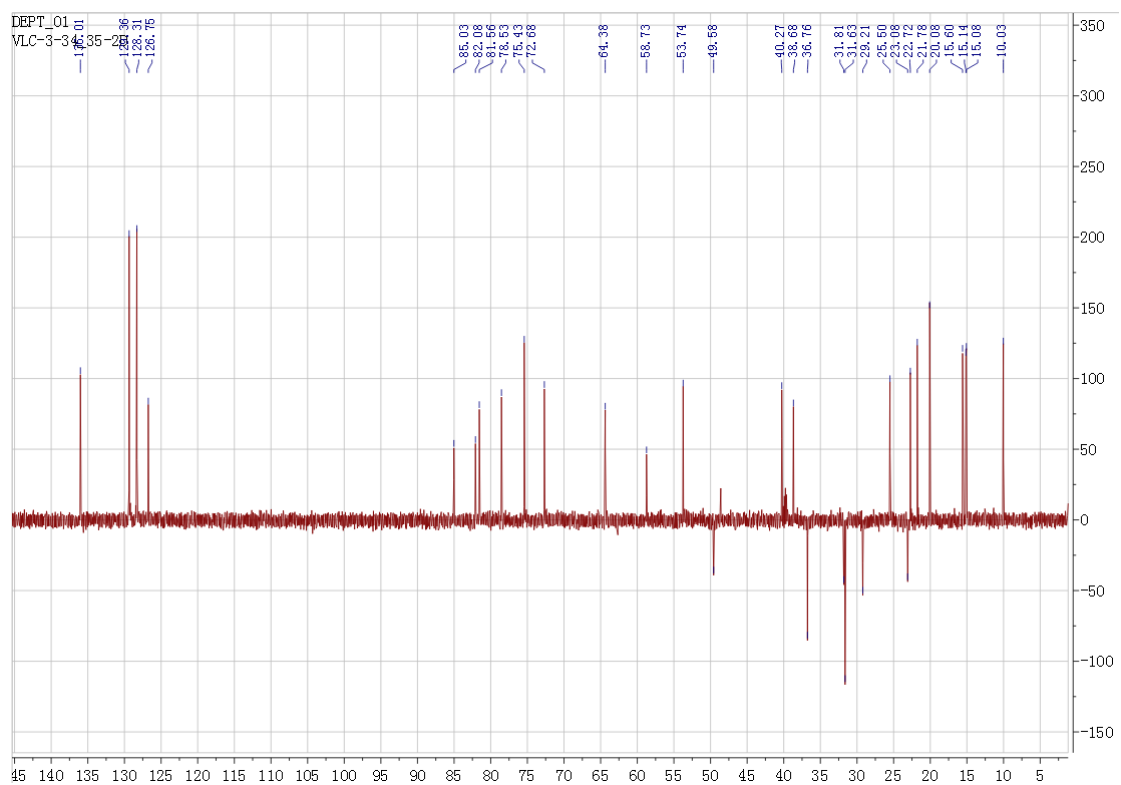

**Figure S5.**  $^1\text{H}$ - $^1\text{H}$  COSY spectrum of **1** in  $\text{DMSO-}d_6$ .

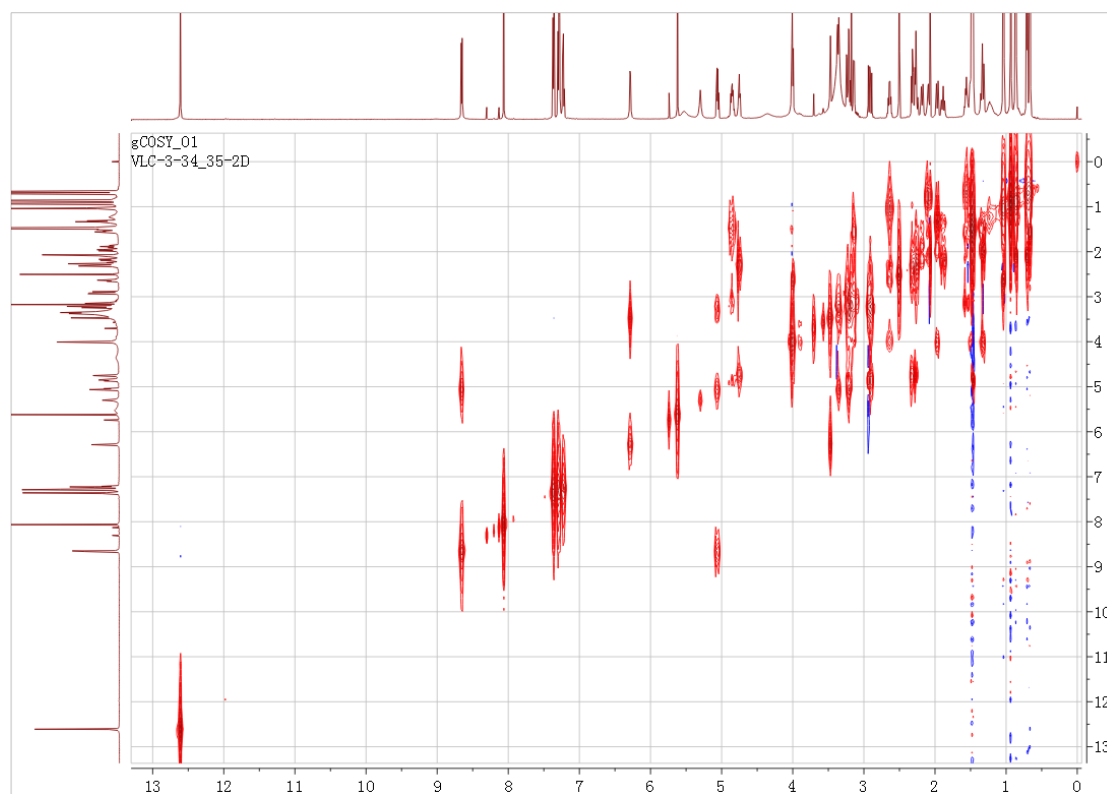

**Figure S6.** HSQC spectrum of **1** in  $\text{DMSO-}d_6$ .

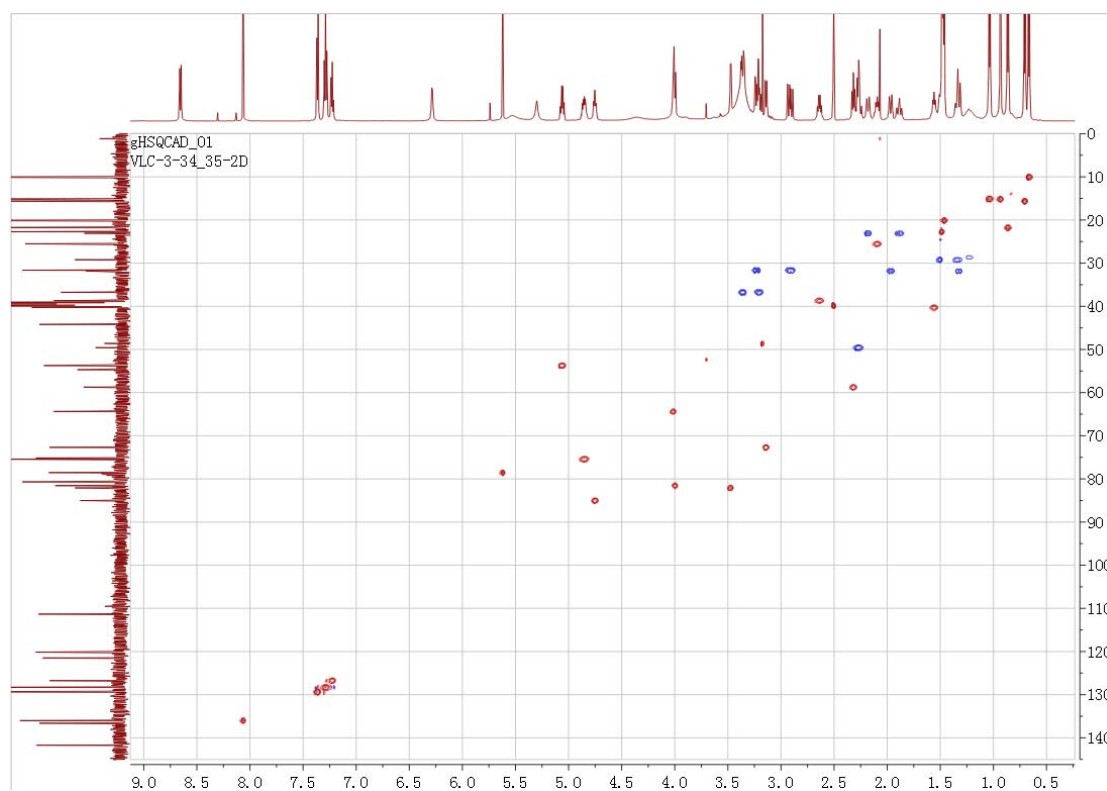

**Figure S7.** HMBC spectrum of **1** in DMSO-*d*<sub>6</sub>.

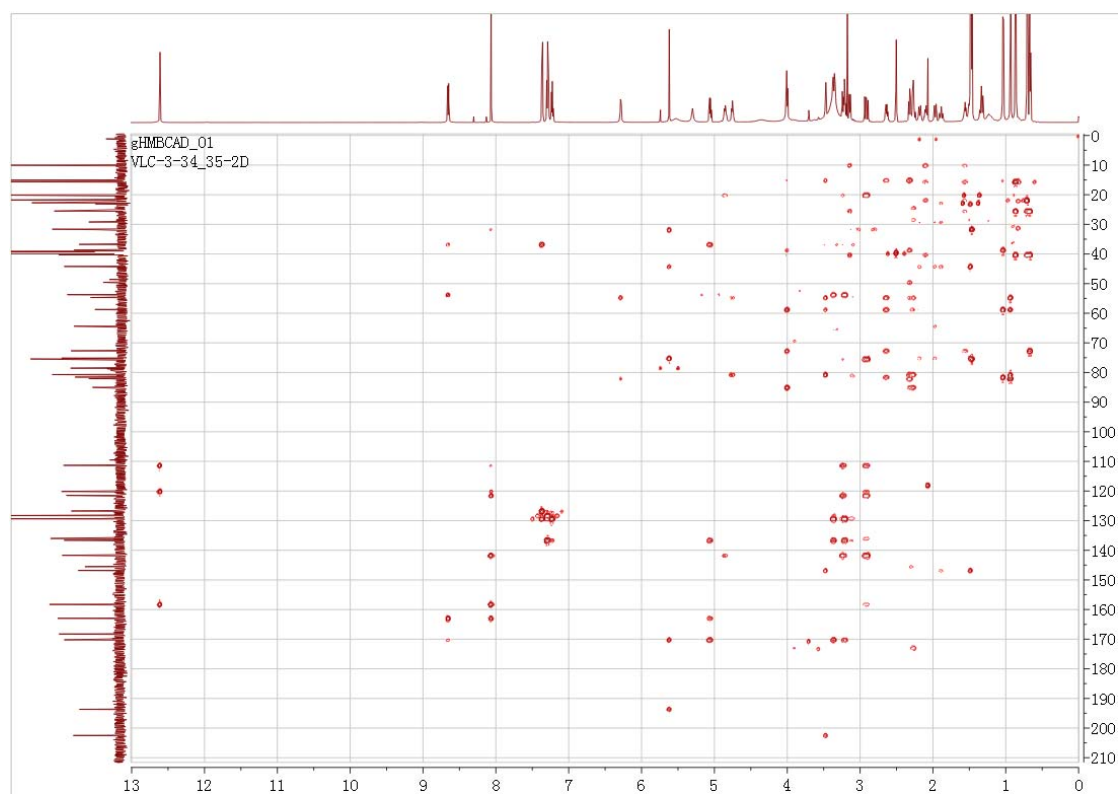

**Figure S8.** ROESY spectrum of **1** in DMSO-*d*<sub>6</sub>.

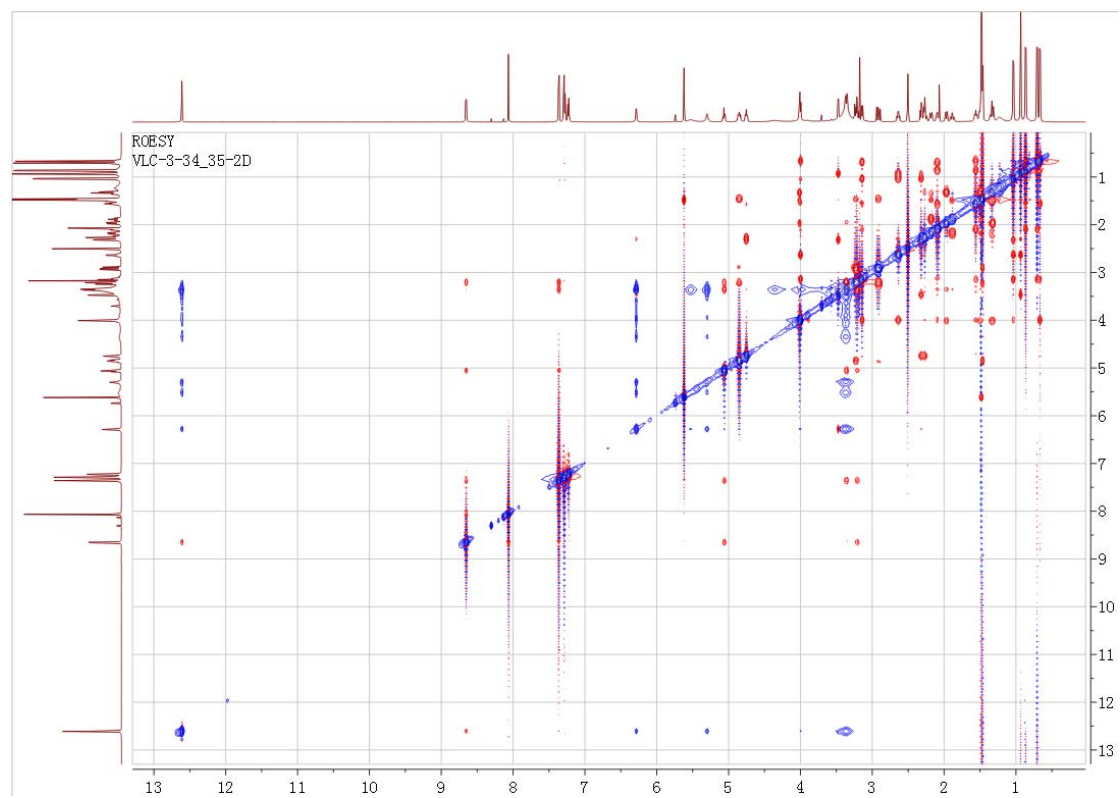

**Figure S9.** HRESIMS of **1**.

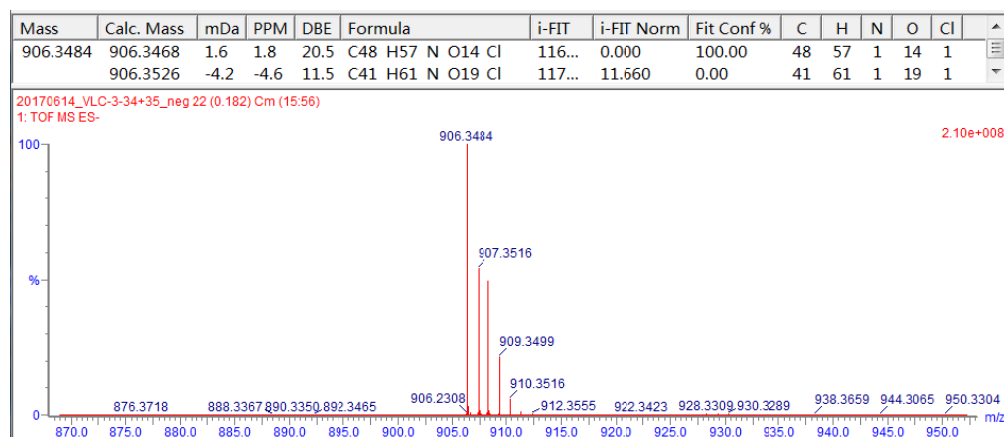

**Figure S10.** HRESIMS/MS of **1** (a) positive ion mode; (b) negative ion mode.

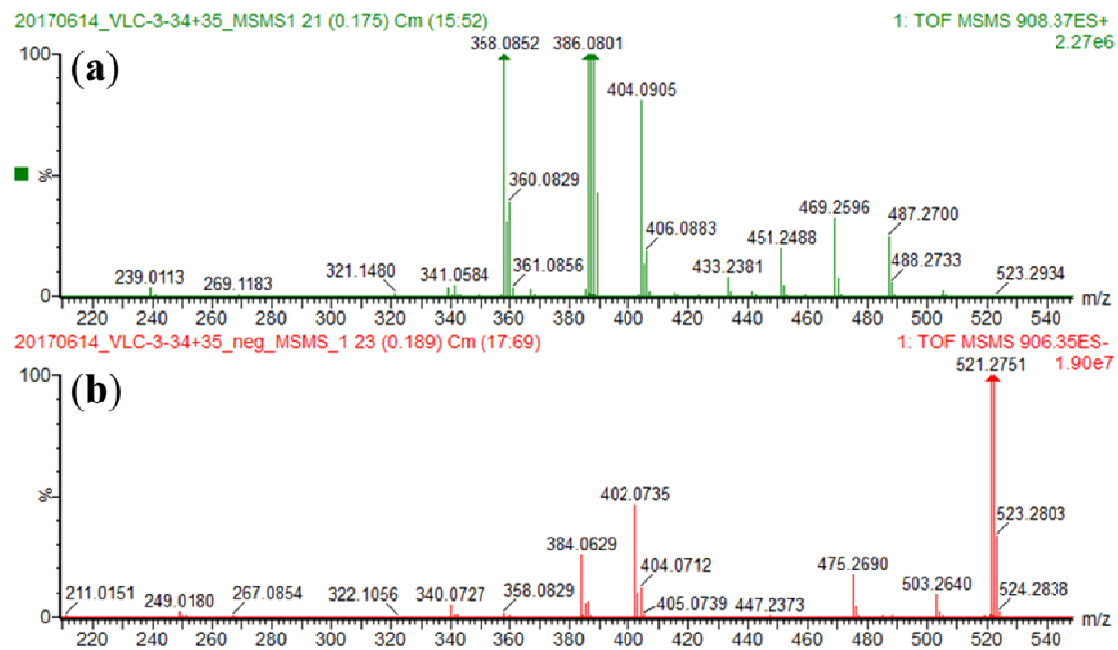

**Figure S11.** UV spectrum of **1** in MeOH.

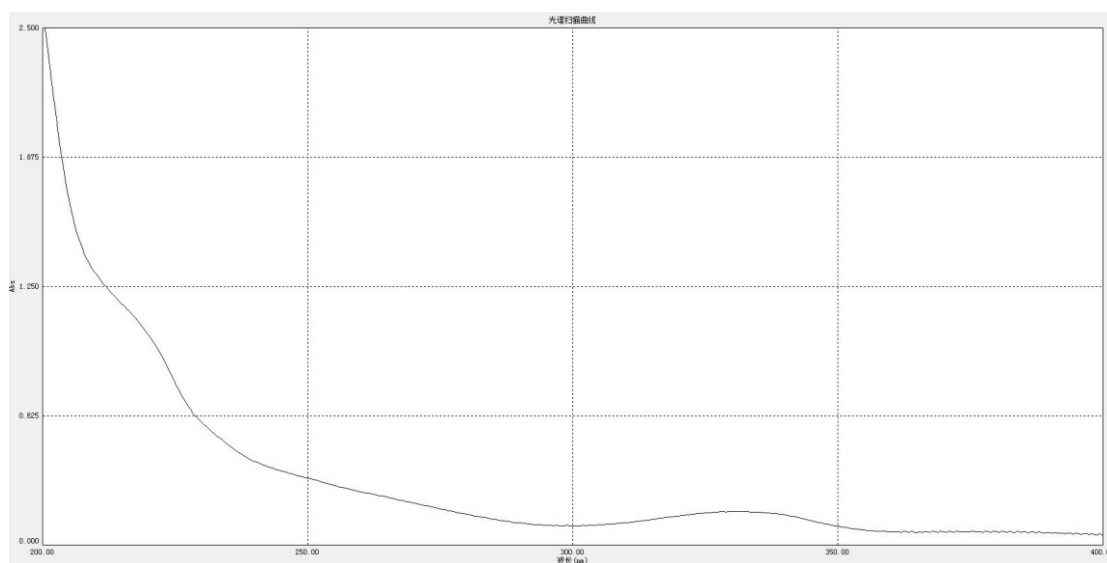

**Figure S12.** IR spectrum of **1**.

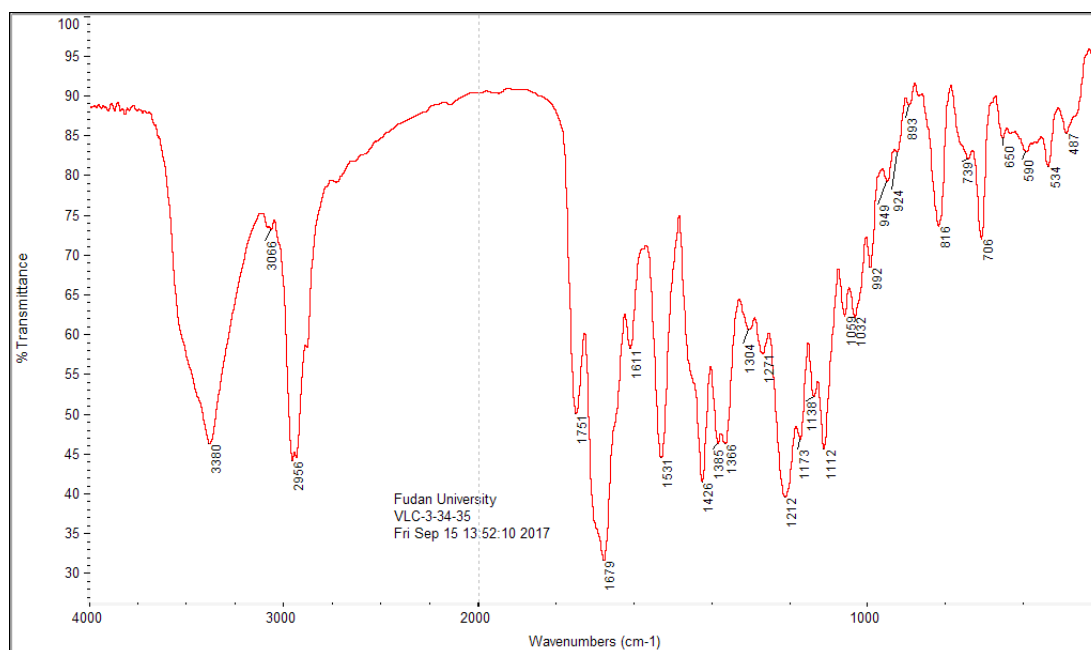

Figure S13. ECD spectrum of **1** in MeOH.

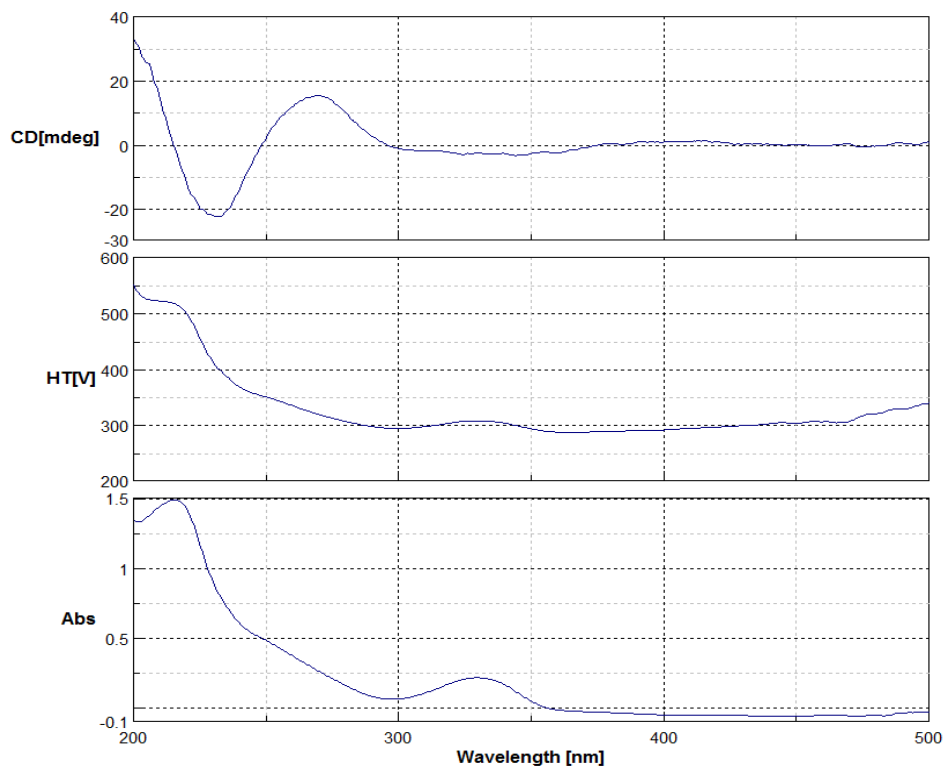

Figure S14.  $^1\text{H-NMR}$  spectrum of **2** in  $\text{DMSO-}d_6 + 1\% \text{ TFA}$ .

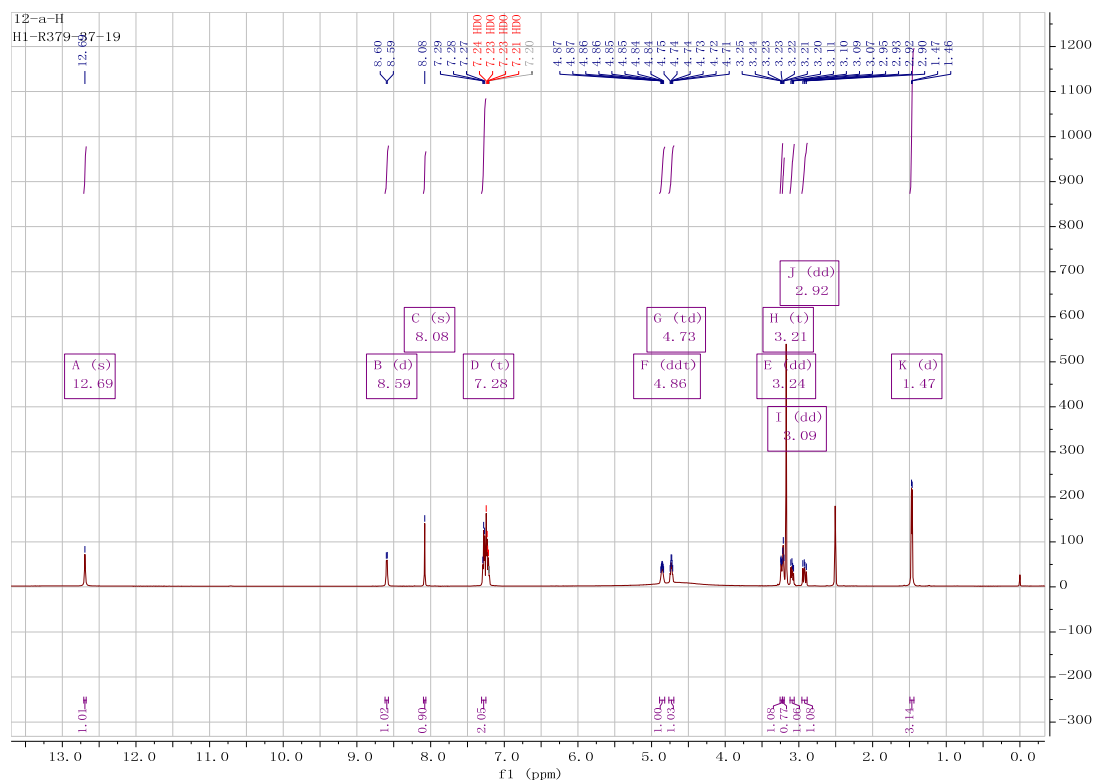

**Figure S15.**  $^{13}\text{C}$ -NMR spectrum of **2** in  $\text{DMSO-}d_6 + 1\% \text{ TFA}$ .

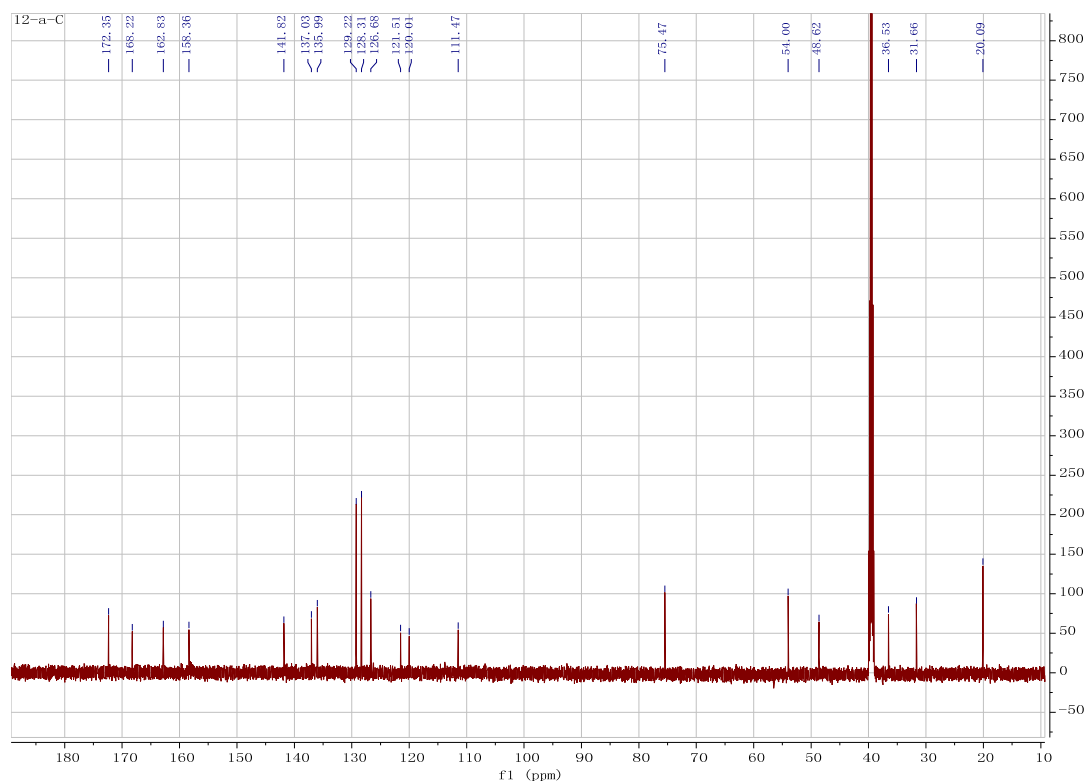

**Table S3.**  $^1\text{H}$  (600 MHz) and  $^{13}\text{C}$  (150 MHz) NMR Data of **2** in  $\text{DMSO-}d_6 + 1\% \text{ TFA}$

| Position | $\delta_{\text{C}}$ , type | $\delta_{\text{H}}$ (J in Hz)                    | Position | $\delta_{\text{C}}$ , type | $\delta_{\text{H}}$ (J in Hz) |
|----------|----------------------------|--------------------------------------------------|----------|----------------------------|-------------------------------|
| 1        | 162.8, C                   |                                                  | 13       | 54.0, CH                   | 4.86, ddt (9.7, 6.2, 3.4)     |
| 3        | 75.5, CH                   | 4.73, td (7.7, 4.8)                              | 14       | 36.5, $\text{CH}_2$        | 3.09, dd (13.8, 8.2)          |
| 4        | 31.7, $\text{CH}_2$        | 3.21 <sup>[a]</sup> , m<br>2.92, dd (17.2, 11.7) |          |                            | 3.23 <sup>[a]</sup> , m       |
| 5        | 121.5, C                   |                                                  | 15       | 136.0, C                   |                               |
| 6        | 137.0, CH                  | 8.08, s                                          | 16       | 129.2, CH                  | 7.18–7.31, m                  |
| 7        | 120.0, C                   |                                                  | 17       | 128.3, CH                  | 7.18–7.31, m                  |
| 8        | 158.4, C                   |                                                  | 18       | 126.7, CH                  | 7.18–7.31, m                  |
| 9        | 111.5, C                   |                                                  | 19       | 128.3, CH                  | 7.18–7.31, m                  |
| 10       | 141.8, C                   |                                                  | 20       | 129.2, CH                  | 7.18–7.31, m                  |
| 11       | 168.2, C                   |                                                  | 21       | 20.1, $\text{CH}_3$        | 1.47, d (6.3)                 |
| 12-NH    |                            | 8.59, d (7.4)                                    | 22       | 172.3, C                   |                               |
|          |                            |                                                  | 8-OH     |                            | 12.69, s                      |

[a] Overlapped with other signals.
